1  
2  
3  
4  
5  
6  
7  
8  
9  
10  
11  
12  
13  
14  
15  
16  
17  
18  
19  
20  
21  
22  
23  
24  
25  
26  
27  
28  
29  
30  
31  
32  
33  
34  
35  
36  
37  
38  
39  
40  
41  
42  
43  
44  
45  
46

**Mutations at the Alphavirus E2/E1 inter-dimer interface have host-specific phenotypes**

Sophia C. Ren<sup>1,‡</sup>, Shefah A. Qazi<sup>1,‡</sup>, Brian Towell<sup>2</sup>, Joseph CY Wang<sup>3</sup>, and Suchetana Mukhopadhyay<sup>1,\*</sup>

<sup>1</sup>Department of Biology, <sup>2</sup>Molecular and Cellular Biochemistry, Indiana University, Bloomington, IN 47405, and <sup>3</sup>Department of Microbiology and Immunology, Penn State College of Medicine, Hershey, PA 17033

Running Title: Contacts between E1-E2 heterodimers affect particle assembly

<sup>‡</sup>These authors contributed equally to this work

<sup>2</sup>Current address: LabCorp Drug Development. Indianapolis, IN

\*Corresponding author: 212 S. Hawthorne Drive, Bloomington, IN 47405.

812-856-3686 (Phone)

[sumukhop@indiana.edu](mailto:sumukhop@indiana.edu) (Email)

47 **ABSTRACT**

48       Alphaviruses are enveloped viruses transmitted by arthropod vectors to vertebrate  
49 hosts. The surface of the virion contains 80 glycoprotein spikes embedded in the  
50 membrane and these spikes mediate attachment to the host cell and initiate viral fusion.  
51 Each spike consists of a trimer of E2-E1 heterodimers. These heterodimers interact at  
52 two interfaces: (1) the intra-dimer interactions between E2 and E1 of the same  
53 heterodimer, and (2) the inter-dimer interactions between E2 of one heterodimer and E1  
54 of the adjacent heterodimer (E1'). We hypothesized that the inter-dimer interactions are  
55 essential for trimerization of the E2-E1 heterodimers into a functional spike. In this work,  
56 we made a mutant virus (CPB) where we replaced six inter-dimeric residues in the E2  
57 protein of Sindbis virus (WT SINV) with those from the E2 protein from chikungunya  
58 virus, and studied its effect in both mammalian and mosquito cell lines. CPB produced  
59 fewer infectious particles in mammalian cells than in mosquito cells, relative to WT  
60 SINV. When CPB virus was purified from mammalian cells, particles showed reduced  
61 amounts of glycoproteins relative to capsid protein, and contained defects in particle  
62 morphology compared to virus derived from mosquito cells. Using cryo-EM, we  
63 determined that the spikes of CPB had a different conformation than WT SINV. Last, we  
64 identified two revertants, E2-H333N and E1-S247L, that restored particle growth and  
65 assembly to different degrees. We conclude the inter-dimer interface is critical for spike  
66 trimerization and is a novel target for potential antiviral drug design.

67

68 **IMPORTANCE**

69       Alphaviruses, which can cause disease when spread to humans by mosquitoes,  
70    have been classified as an emerging pathogen, with infections occurring worldwide. The  
71    spikes on the surface of the alphavirus particle are absolutely required for the virus to  
72    enter a new host cell and initiate an infection. Using a structure-guided approach, we  
73    made a mutant virus that alters spike assembly in mammalian cells but not mosquito  
74    cells. This is important because it identifies a region in the spike that could be a target  
75    for antiviral drug design.

76  
77  
78  
79  
80

## 81 INTRODUCTION

82 Alphaviruses are most commonly transmitted by arthropod vectors, usually  
83 mosquitoes, to vertebrate hosts, including humans, birds, and horses (1, 2). While a  
84 majority of alphaviruses have an arthropod vector, a group of alphaviruses have been  
85 identified to transmit only between invertebrates (3), and others use a different vector to  
86 infect aquatic animals (4). Therefore, for an alphavirus to complete its infection cycle, it  
87 must be able to assemble particles in all of these host environments. Virus infection  
88 must rely on different host factors since the same viral proteins are synthesized.

89 The alphavirus genome consists of four nonstructural proteins and six structural  
90 proteins, which are required for viral genome replication and particle assembly,  
91 respectively (1, 2, 5, 6). The alphavirus particle consists of an inner nucleocapsid core,  
92 a host-derived lipid membrane, and 80 trimeric spikes on the surface of the virion (7).  
93 The spikes are trimers of E2-E1 heterodimers with each heterodimer forming the edge  
94 of a triangular spike. Both the E2 and E1 proteins each contain a single transmembrane  
95 domain and are embedded within the viral membrane. The endodomain of E2 interacts  
96 with the capsid protein in the core in a 1:1 ratio (8-12). Thus, the E2 protein transits the  
97 entire particle and helps align the core and the spikes, a unique feature of alphaviruses  
98 compared to other enveloped viruses (7).

99 Alphavirus spike assembly is a highly regulated process that depends on specific  
100 interactions between the viral proteins and host factors. The structural proteins are  
101 translated as a capsid-E3-E2-6K-E1 polyprotein (or capsid-E3-E2-TF when  
102 frameshifting occurs). Capsid is autoproteolytically cleaved from the rest of the  
103 polyprotein (13). E3 serves as the signal sequence to translocate the rest of the

104 polyprotein into the endoplasmic reticulum (ER) (14, 15), where the cellular enzyme  
105 signalase cleaves the polyprotein into E3-E2 (also known as pE2 or P62), 6K, and E1  
106 (16, 17). When programmed ribosomal frameshifting occurs the protein pE2 and TF are  
107 translated (5). In mammalian cells, the ER chaperones Erp57 and calnexin/calreticulin  
108 regulate the folding and disulfide bond formation of E2 (18-20), and BiP and protein  
109 disulfide isomerase do the same for E1 (18-22). pE2 and E1 form heterodimers within  
110 the ER, before transiting to the Golgi where trimerization of the stable spike complex is  
111 predicted to occur. Glycosylation of E2 and E1 occur in the ER and Golgi. In the ER and  
112 Golgi, there is a slight decrease in pH and the E3 proteins acts as a clamp and prevents  
113 low pH mediated dissociation of the E2-E1 heterodimer (23-25). These spikes in the  
114 stable conformation are transported to the plasma membrane through the host  
115 secretory system. In the late secretory pathway, the cellular enzyme furin cleaves E3  
116 from E2, which acts as a priming event and converts the spike from the stable to  
117 metastable conformation (26, 27). At the plasma membrane, E2 interacts with the  
118 nucleocapsid core, and initiates budding and virus release. Particles may also bud from  
119 glycoprotein-containing vesicles called cytopathic vesicles II, and this pathway is used  
120 more by mosquito cells (28).

121 Voss et al. solved the Chikungunya virus (CHIKV) E2/E1 heterodimer in the  
122 metastable conformation and in complex with E3 at neutral pH in the stable  
123 conformation (29), and Li et al. solved the Sindbis virus (SINV) E2/E1 heterodimer at  
124 acidic pH (30). These structures showed the intra-dimer contacts within a heterodimer.  
125 Both groups fit the atomic heterodimers into cryo-EM structures of alphavirus virions to  
126 identify inter-dimer interactions, or contacts between heterodimers within the spike, and

127 between the E2 and nucleocapsid core. E1 consists of three domains: I-III. Domain II  
128 contains the fusion peptide and makes extended contacts with E2 in the intra-dimer  
129 heterodimer (29-31). This intra-dimer interface contains the acid-sensitive region and  
130 has been studied in regard to fusion regulation and mutations that expand vector range  
131 (32, 33). E2 has three domains: A-C. Domain B is the most distal domain and acts as a  
132 cap of the distal end of E1 protecting the fusion peptide (29, 30). In the low pH structure  
133 by Li et al., Domain B was disordered suggesting it is the first portion of the heterodimer  
134 to undergo conformational changes in response to low pH (30). Domain A in E2 is the  
135 central domain and Domain C is the closest to the lipid bilayer. Domain C is sandwiched  
136 between Domain II of E1 from its intra-dimer heterodimer and the Domain II of E1 from  
137 the adjacent heterodimer, or E1'. Both Voss et al. and Li et al. identified residues in E2  
138 Domain C that contact residues in Domain II of E1' (29, 30). Based on these two  
139 structures, we hypothesized that E2 Domain C plays a key role in spike assembly, and  
140 disrupting the inter-dimer contacts between E2 and E1' could affect trimer formation.

141 To test the role of Domain C in assembly, we substituted six amino acids in SINV E2  
142 Domain C to the corresponding residues in CHIKV, an alphavirus in a different clade (2,  
143 34). The E2 residues that were mutated are predicted to interact with E1' residues in the  
144 adjacent dimer, or to "piggyback" on the dimers within a spike, and hence our mutant  
145 was named Chikungunya Piggyback (CPB). We determined CPB had slower growth  
146 and smaller plaques when grown in mammalian cells but not mosquito cells. CPB  
147 quickly gained second-site revertants, E2-H333N and E1-S247L, which were each able  
148 to restore growth in CPB. CPB grown in mammalian cells form particles with assembly  
149 defects but the revertants restored their assembly to various degrees. Further analysis

150 of the spike conformations on the CPB by cryo-EM showed the spikes in CPB were  
151 more flexible than the spikes in WT virus.

152

## 153 **RESULTS**

### 154 **Domain C of E2 is important for spike trimerization**

155 The atomic structure of the CHIKV E2/E1 heterodimer identified the interface  
156 between E2 and E1 within a heterodimer and the intra-dimer contacts that were present.  
157 When these heterodimers were placed into the cryo-EM density of intact SINV virions,  
158 the potential contacts between heterodimers, or inter-dimer contacts, were identified  
159 (Figure 1A-1C). In the virion, Domain C of the E2 protein was sandwiched between two  
160 E1 proteins, one in the same heterodimer, designated as E1, and one from the adjacent  
161 heterodimer, designated as E1' (Figure 1D, 1E) (29). We have colored the different  
162 domains of E1 and E2 in Figure 1E to illustrate these interactions of Domain C of E2.  
163 We hypothesized that Domain C would be important for spike trimerization because  
164 these inter-dimer contacts would bridge or connect the individual E2-E1 dimers into  
165 trimers.

166 Voss et al., identified ten residues in E2 Domain C that contact 12 residues in E1  
167 Domain II in the adjacent heterodimer (29). In the low pH SINV E2/E1 heterodimer  
168 structure, Li et al identified three residues in E2 Domain C that contact four residues in  
169 E1' Domain II, all also identified in the CHIKV structure (30). Residues E2-272 to E2-  
170 288 in Domain C contained a majority of the E2 inter-dimer contacts (Figure 1F, 1G).  
171 While there are 13 residues that differ between SINV and CHIK in the primary amino  
172 acid sequence in the E2-272 to E2-288 region, only six of these residues are in contact

173 with E1' in the tertiary structure. Using SINV as our parental virus, we mutated the six  
174 residues in this region from SINV to residues found in CHIKV, which belongs to a  
175 different clade than SINV (Figure 1F, 1G) (2, 34). The resulting mutant was named  
176 CHIK-Piggy-Back (CPB), as the SINV E1' residues “piggyback” on the six E2 residues  
177 that were introduced from CHIKV. We opted to focus on the E2 inter-dimer residues  
178 because there are fewer contact residues in E2 than E1 and we speculated that  
179 mutating a larger number of residues in E1 would have increased the chance of  
180 misfolding due to too many disrupted interactions within the E1 protein itself (21).

181

### 182 **Growth of CPB is attenuated in mammalian cells compared to in mosquito cells**

183 To determine the effect of our CPB mutation, we infected mammalian (BHK-21) and  
184 mosquito (C6/36) cells at an MOI of 1 PFU/cell and quantified infectious virus release  
185 over time. In BHK cells, the CPB growth was attenuated, producing virus 1 to 1.5 logs  
186 lower titer than WT SINV (Figure 2A) as early as 8 hours post-infection. Additionally,  
187 CPB had a mean plaque size of 1 mm compared to the mean plaque size of 2 mm for  
188 WT SINV (Figure 3A, 3C). In C6/36 cells, however, CPB grew at a similar rate  
189 compared to WT SINV (Figure 2B). BHK cells are typically grown at 37°C, while C6/36  
190 cells are grown at 28°C. To rule out temperature dependence on growth, we also  
191 measured WT SINV and CPB growth in BHK cells grown at 28°C. We found that there  
192 was still a 1 to 1.5 log reduction in CPB titer relative to WT SINV (Figure 2C) suggesting  
193 attenuated CPB growth is mainly an effect of different host cell environment, rather than  
194 solely different temperatures.

195



196 **Two separate second-site revertants identified for CPB**

197 As we worked with the CPB virus, we noticed that the virus reverted quickly as  
198 indicated by the change in plaque size phenotype from small to large. Changes in  
199 plaque size were evident often after cells were infected more than 40 hours or  
200 passaged more than two or three times (Figure 3A). To isolate revertants, we passaged  
201 CPB in BHK cells and saw a mixed plaque phenotype. We isolated and plaque-purified  
202 larger plaques, and then isolated and sequenced the viral RNA. We identified two  
203 independent single-site revertants, E2-H333N and E1-S247L (Figure 3B). E2-H333N  
204 was seen four times, and E1-S247L was seen once. Another mutation, E1-P250S, was  
205 seen twice but only in combination with E2-H333N. We focused on E2-H333N and E1-  
206 S247L since these single-sites potentially changed the virus fitness on their own. Both  
207 the E2-H333N and E1-S247L mutations were in close proximity to the inter-dimer  
208 interface (Figure 3B). E2-H333N is spatially near the six-residue cluster we mutated in  
209 E2, approximately 13 Å away from the center of the E2 inter-dimer contacts. E1-S247L  
210 is approximately 20 Å away from the center of the ten residues of E1' which interact with  
211 the six residues of E2. SINV E1 is glycosylated at position 245. The E1-S247L mutation  
212 abrogates the N-X-S/T motif needed for N-linked glycosylation at residue E1 245 (35),  
213 by changing the Ser to Leu (Table 1).

214 To determine how these point mutations affect viral assembly, both of these  
215 mutations were inserted back into CPB and the WT SINV virus. The plaque sizes of the  
216 two revertants cloned into CPB were larger, comparable to that seen with WT SINV  
217 virus. The mean plaque size of CPB E2-H333N was 1.6 mm and of CPB E1-S247L was  
218 1.9 mm; both larger than CPB which was 1 mm (Figure 3C). Next, growth kinetics of

219 CPB E2-H333N and CPB E1-S247L were examined independently by infecting BHK  
220 cells (Figure 3D). Both revertants resulted in a higher virus yield which grew between 1-  
221 2 logs better than the parental CPB and at a similar rate as WT SINV, indicating that  
222 both revertants rescued growth in CPB background. We also conducted growth kinetics  
223 in C6/36 cells (Figure 3E) and observed no difference between the two revertants in  
224 CPB, CPB and WT SINV. When the two mutations were independently cloned into the  
225 WT SINV backbone and the viral growth examined in both BHK and C6/36 cells, we  
226 observed no change in plaque size or growth kinetics. These results indicate that both  
227 of the mutations are neither deleterious nor enhancing in the absence of the CPB  
228 mutations.

229

### 230 **CPB particles show defects in spike incorporation compared to WT SINV**

231       Alphavirus spikes initially form dimers and then these dimers trimerize before  
232 localizing to the plasma membrane. If the spikes do not trimerize, transport to the  
233 plasma membrane is reduced. Spike trimerization is thought to be important for  
234 alphavirus budding. In our CPB mutant, we used the alphavirus structures and targeted  
235 residues that we thought would disrupt spike trimerization but not dimerization as  
236 determined from Voss et al. and Li et al. (29, 30). To determine how particle budding  
237 was affected in the CPB mutant, we looked at the composition and morphology of  
238 purified virus particles from both BHK and C6/36 cells.

239       We purified virus particles through a sucrose cushion, ran them on an SDS-PAGE  
240 gel, and examined the protein composition. We noticed that BHK purified CPB particles  
241 have reduced amounts of E1 and E2 glycoproteins relative to capsid protein when

242 compared to the amounts of these proteins in WT SINV (Figure 4A). This could suggest  
243 fewer spikes are associated with the virion and/or the associated spikes may easily  
244 dissociate during the purification process compared with WT particles. The E1 protein  
245 band in CPB E1-S247L migrates faster than E1 in WT SINV. The E1 protein in CPB E1-  
246 S247L is at the same position as the E1 band in the SINV E1-N245/246Q virus which is  
247 known to have one of the two E1 glycosylation sites disrupted resulting in a faster  
248 migrating E1 protein band. As an additional control, the purified virion of SINV E1-  
249 N139Q/E2-N318Q which has one E1 glycosylation site and one E2 glycosylation site  
250 disrupted resulting in faster migration in both of those protein bands (Figure 4A) was  
251 also included (35).

252 In contrast to BHK cells, C6/36 purified CPB particles showed similar amounts of E1  
253 and E2 glycoproteins to WT SINV (Figure 4B), suggesting qualitatively that the amount  
254 of spike proteins in released and purified particles were similar to WT SINV. The  
255 revertants also had similar protein composition to WT SINV with CPB E1-S247L having  
256 a faster migrating E1 protein band (Figure 4B). In both CPB and CPB E2-H333N virions,  
257 the E2 protein is a smeared band suggesting heterogenous glycosylation on the E2  
258 protein (36).

259

### 260 **CPB particles from mammalian cells show defects in particle morphology, which** 261 **are partially or fully rescued by revertants**

262 The reduced amount of glycoproteins in CPB particles suggested that the CPB  
263 particle may be morphologically different compared to WT particles. To test this, we  
264 stained our particles with uranyl acetate and imaged using transmission electron

265 microscopy (TEM). WT SINV is approximately 70 nm in size and spherical and this is  
266 observed in both WT particles purified from BHK (Figure 4C) and C6/36 cells (Figure  
267 4D). CPB, however, made almost no identifiable virus particles when purified from BHK  
268 cells (Figure 4C). We also noticed that any visible particles were not spherical. CPB E2-  
269 H333N partially rescued particle morphology while CPB E1-S247L fully recovered  
270 particle morphology (Figure 4C). CPB E2-H333N made more particles than CPB, and  
271 some of them looked to be around 70 nm in size; however, many non-spherical particles  
272 were still seen. On the other hand, CPB E1-S247L made primarily spherical particles of  
273 70 nm diameter, similar to WT SINV. In both CPB E2-H333N and CPB E1-S247L, there  
274 are also small particles ranging in size of approximately 10-40 nm, which could be  
275 assembly intermediates or disassembled fragments. These smaller particles suggest  
276 that CPB E2-H333N and CPB E1-S247L particles may still be fragile compared to WT  
277 SINV, despite being just as infectious.

278 WT SINV, CPB, and revertant virus particles purified from C6/36 were spherical and  
279 homogenous in shape, consistent with no major assembly or growth defects (Figure  
280 4D). CPB particles appeared to have dimples or creases. This could suggest that even  
281 in C6/36 cells the mutations made in CPB are detrimental to proper spike formation or  
282 have defects in assembly but are still good enough that infectious particle assembly  
283 occurs (28).

284

### 285 **Glycoprotein transport is not significantly affected in CPB**

286 The low amounts of glycoproteins in CPB virions compared to WT SINV virions from  
287 BHK cells led us to two hypotheses. One, CPB has defects in spike trimerization and

288 transport to the plasma membrane is diminished. Or second, CPB virions are  
289 misassembled because inter-dimer contacts have been disrupted. As a result, CPB may  
290 disassemble more than WT SINV during the purification process. These options are not  
291 mutually exclusive.

292 We used immunofluorescence to test if glycoprotein transport was altered in CPB  
293 compared to WT SINV. We infected BHK cells at an MOI of 2 PFU/cell for ten hours, a  
294 time where there was a difference in infectious particles released and probed for  
295 glycoproteins at the cell membrane (Figure 5). Cells were fixed with paraformaldehyde,  
296 a non-permeabilizing fixative, and probed for SINV glycoproteins. Under these infection  
297 conditions, cells were not displaying CPE (Figure 5A, 5C). There was no drastic  
298 difference in glycoprotein levels at the plasma membrane between WT SINV, CPB, and  
299 revertant infected cells (Figure 5C, 5D). Virus-infected cells were equally healthy and  
300 had comparable amounts of detectable glycoproteins.

301

### 302 **Spikes in CPB particles are distorted compared to WT SINV**

303 The difference in particle morphology between CPB and WT SINV in mammalian  
304 cells was striking when imaged by TEM (Figure 4C, 4D). To further examine the particle  
305 structure and spike morphology, we purified virions and used cryo-EM to solve their 3D  
306 reconstructions. We focused on WT SINV, CPB, and the revertant CPB E1-S247L since  
307 these had the most extreme phenotypes and their structures would be most clear by  
308 cryo-EM (Figure 6). We imposed icosahedral averaging (Table 2) during the  
309 reconstruction process. The overall structural organizations of all six particles (WT  
310 SINV, CPB, CPB E1-S247L from BHK and C6/36) were preserved (Figure 6A-F). There

311 are 80 petal-like spikes arranged into a T=4 surface lattice; the white triangle delineates  
312 one asymmetric unit (Figure 6A) (37). No clear E3 density was observed in any of the  
313 particles, consistent with what has been previously observed with SINV (8). The glycan  
314 modification at E2-196, located at the distal end of the E2 protein, was clearly seen  
315 when the estimated resolution is better than 10 Å (red arrows). As seen in other  
316 alphavirus structures (7, 38-42), the E1 protein contributes to the continuous shell  
317 underneath the spikes (Figure 6A-F, yellow color) with holes at every twofold and  
318 fivefold above the membrane. Note the resolution of the particles range from 4.5 Å to  
319 10.7 Å, which reflects both the number of particles used in the reconstruction (Table 2)  
320 and the heterogeneity of the particles themselves.

321 However, when looking more carefully at the enlarged view of each spike at the  
322 quasi-threefold axis, (dotted circle Figure 6A), there were discernable differences  
323 between the samples (Figure 6G-L). We chose the quasi three-fold spike because  
324 spikes at the 5-, 3-, 2- fold would, by default of icosahedral symmetry, be identical. The  
325 spikes at the quasi symmetry axes would not have any symmetry imposed on them and  
326 differences in morphology would be more evident. To best compare the quasi-three  
327 spikes, we show them all at 10.7 Å, the resolution of CPB from BHK cells. The irregular  
328 density at the inter-dimer location of the spike was clearest in CPB purified from BHK  
329 cells (Figure 6H, black arrows). Note that the density of two lobes at the spike petal  
330 were fused together, while the other heterodimer within the same spike remained  
331 separate (Figure 6H, BHK CPB). For the other five particles, the E1/E2 dimers within a  
332 spike were organized in a trimeric manner with true trimeric symmetry.

333

334 **DISCUSSION**

335 To investigate the role of the inter-dimeric contacts in assembly, we used a  
336 structure-guided approach and mutated six residues in E2 that, in the stable and  
337 metastable structures of the spike, are at the interface with the adjacent E1' protein  
338 (Figure 1) (29, 30). We called this mutant CPB. We found that CPB growth is attenuated  
339 in mammalian cells compared to mosquito cells (Figure 2). In mammalian cells, CPB  
340 glycoprotein expression on the cell surface is similar to WT SINV (Figure 5), but the  
341 released particles show CPB particle composition and morphology is defective in  
342 mammalian cells while minimally affected in mosquito cells (Figure 4). Our cryo-EM  
343 structures of CPB show that CPB particle spikes do not have three symmetrical lobes.  
344 Figure 6 shows a visible gap between two of the lobes and the third, which could  
345 suggest that two heterodimers are interacting but the third is not. The mutations in E2  
346 disrupt inter-dimer contacts and we hypothesized that CPB growth falls behind WT  
347 SINV because of its subsequent assembly defects. However, it is difficult to separate  
348 assembly defects from downstream entry impacts.

349 The difference in phenotype in mammalian and mosquito cells suggests that there is  
350 a host factor that is involved in the trimerization of E2-E1 heterodimers since the same  
351 viral proteins are assembling in each host cell. If this assembly was autonomous, we  
352 would not observe a host-specific difference in both infectious particle production and  
353 particle morphology. These differences could be due to different post-translational  
354 modifications by the host, different host-protein chaperones affecting virus assembly, or  
355 a combination of both. BHK and C6/36 cells are defective some innate immune  
356 responses so the attenuation in growth is not entirely a host response to infection. The

357 CPB mutant and its revertants will be useful to identify host chaperones important in  
358 spike assembly.

359

### 360 **Stability, composition, and conformation of CPB and revertant spikes**

361 Our immunofluorescence results show that glycoprotein transport to the plasma  
362 membrane is comparable between CPB and WT SINV. However, nothing about the  
363 conformation of the spikes can be concluded. Furthermore, while E2-E1 are most stable  
364 as heterodimers, small amounts of the monomeric proteins will localize to the plasma  
365 membrane (15). Our results cannot differentiate conformation or oligomeric state of the  
366 glycoproteins at the cell surface.

367 It is perplexing that we can obtain a structure of CPB purified from BHK cells when  
368 this same sample shows few particles by negative-stain TEM and there were low levels  
369 of glycoproteins when we look at particle composition on an SDS-PAGE gel (Figure 4).  
370 There are several possibilities for these discrepancies, and likely more than one is a  
371 contributing factor.

372 Due to the trimerization defect, fewer spikes may be incorporated into virus particles,  
373 and those that are on the particle may be more heterogenous compared to WT SINV.  
374 The CPB trimer has a different conformation than the WT SINV trimer, it could also be  
375 that the cytoplasmic domain of E2 is no longer able to interact with capsid in a 1:1 ratio  
376 and this affects titer and particle stability. The reduced number of spikes on the particles  
377 explains the lower titers (Figure 2) and why purified particles show lower amounts of  
378 spike proteins in CPB compared to WT SINV (Figure 4). Our cryo EM results also  
379 support this hypothesis. We used roughly 16,000 CPB and CPB E1-S247L particles



380 each from BHK infected cells for our reconstructions. Yet the resolutions of the final  
381 structures were  $\sim 11\text{\AA}$  and  $6\text{\AA}$  respectively, suggesting more heterogenous particles for  
382 CPB than the revertant. WT SINV only used 9,000 particles and a resolution of  $8\text{\AA}$  was  
383 obtained. From our cryo-EM reconstructions, we can see heterogeneity in the individual  
384 spikes of CPB compared to WT SINV and CPB E1-S247L particles. Interestingly, our  
385 TEM images show that CPB S247L produces particles that are much more WT-like than  
386 CPB H333N, despite both revertants restoring CPB growth.

387 Together the lower number of spikes and their misassembly and heterogeneity could  
388 account for particle instability. Fewer spikes on the surface means there is no E1 lattice  
389 that covers the viral envelope. The particles are more fragile and sensitive to chemicals.  
390 Particles are dehydrated and treated with an acidic stain when preparing for negative  
391 stain imaging, and as a result, particles may disassemble or aggregate. In contrast,  
392 flash freezing the samples for cryo preservation has a mild effect on the particle's  
393 integrity so misassembled particles will be frozen and can be analyzed.

394

### 395 **Possible implications of revertant residues**

396 CPB quickly reverted resulting in two independently fit mutations, E2-H333N and E1-  
397 S247L, and one mutation, P250S, which was seen only in combination with E2 H333N.  
398 E2-H333N, E1-S247L, and P250S are all in close proximity to the cluster of mutations  
399 made at the inter-dimer interface, although none were identified by Voss or Li as one of  
400 the inter- or intra-dimer contact residues (29, 30). Residue 333 for most viruses is either  
401 a histidine or an asparagine. Additionally, the corresponding residue for SINV H333 is  
402 N330 in CHIKV. Because the histidine side chain has a pKa of 6.00, it is within the

403 range of different pH environments in the host cell. This histidine residue may affect  
404 CPB either during entry, specifically during disassembly in the endosome (43, 44), or  
405 during assembly as the E2-E1 heterodimer travels through the ER and Golgi (45). The  
406 role in disassembly could be unfavorable in CPB, since it may have a less stable trimer  
407 and less stable heterodimers even without a low pH environment. During assembly of  
408 the CPB E2-E1 heterodimers, there may be improper folding possibly making trimer  
409 assembly more sensitive to pH which cannot occur with H333.

410 S247L interferes with N-linked glycosylation motif that allows E1-N245 to be  
411 glycosylated. In CHIKV, there is only one glycosylation site on E1 at N141 versus two in  
412 SINV, one at N139 and one at N245 (Table 1) (35, 38). Although residue 247 is not  
413 conserved among alphaviruses, it is clear that some viruses including SINV have the N-  
414 X-S/T glycosylation motif at N245, while others including CHIKV do not. It is interesting  
415 that CPB S247L appears more WT-like in particle morphology than CPB H333N. It is  
416 possible that de-glycosylation at this site allows for better folding or removes a steric  
417 hinderance that allows for trimerization.

418 From our revertant sequencing we also saw that in some instances when E2-H333N  
419 was mutated, E1-P250S was also mutated. Residue 250 is a proline residue in SINV  
420 and a serine residue in CHIKV. It was seen with H333N but does not seem necessary  
421 for restoring growth since H333N was seen alone two times and CPB H333N  
422 independently restored growth. However, the proline residue in CPB might disrupt  
423 folding since it is unable to form hydrogen bonds. This could explain why CPB H333N  
424 has less spherical looking particles, despite having growth comparable to that of WT  
425 SINV. In all three cases, it appears that CPB is reverting to be more like CHIKV.

426

427 **Other revertants in spike proteins that show host specificity**

428 Our work is not the first time a mutation has shown host specificity in alphaviruses.

429 In CHIKV, Ashbrook et al., showed a mutation at E2 G82R enhanced infectivity in

430 mammalian cells but reduced infectivity in mosquito cells and reduced virulence in

431 mouse model (46). This residue is present on the exterior of the E2 protein and was

432 determined to be important to GAG binding, entry and virulence.

433 Jupille et al. identified Ross River E2 Y18H as having a fitness advantage in

434 mosquito cells and a disadvantage in mammalian cells (47). This residue lies in the

435 intra-dimer interface of the E2-E1 heterodimer. Interestingly, in the Ross River clade,

436 the viruses have either a tyrosine or a histidine at position 18 and the authors suggest,

437 this residue serves as a regulator of fitness between the mosquito vector and

438 mammalian host (47). In our work, the revertant E2 H333N was isolated. Most

439 alphaviruses are either a histidine or asparagine at this residue emphasizing the

440 structural and functional requirement of this residue.

441 Our work presented here is the first example of a mutation that has host specificity

442 and mapping to defects in spike assembly. Further work needs to be done to dissect the

443 exact mechanism of where in the spike assembly pathway the CPB mutant fails in

444 mammalian cells and how the revertants overcome these defects. Presented results

445 now allow us to further identify host-specific chaperones and factors necessary for

446 alphavirus glycoprotein folding and oligomerization and possibly extend to other

447 arboviruses that assemble in multiple host environments.

448

## 449 **Materials and Methods**

### 450 **Viruses and cells**

451 The virus strains used in this work were the TE12 strain of SINV and 181/21 strain of  
452 CHIKV (a gift from Dr. Terrence Dermody). BHK-21 cells (BHK) (American Type Culture  
453 Collection, Manassas, VA) were grown in minimal essential medium (Mediatech,  
454 Manassas, VA) supplemented with 10% fetal bovine serum (FBS; Atlanta Biologicals,  
455 Lawrenceville, GA), nonessential amino acids, L-glutamine, and antibiotic-antimycotic  
456 solution (Corning, Corning, NY). BHK-21 cells were grown at 37°C in the presence of  
457 5% CO<sub>2</sub>, or at 28°C in the presence of 5% CO<sub>2</sub>. C6/36 cells (American Type Culture  
458 Collection, Manassas, VA) were grown in identical medium at 28°C in the presence of  
459 5% CO<sub>2</sub>.

460

### 461 **Generation of wild-type and mutant viruses**

462 The CPB mutant virus was generated using a two part QuikChange site-directed  
463 mutagenesis (Agilent, Santa Clara, CA) of the TE12 SINV cDNA clone. First the  
464 residues between nucleotides 9444 and 9494 were deleted, and then the chimera  
465 sequence was inserted. No additional changes were introduced to the chimera virus  
466 during cloning. The mutations were confirmed by sequencing the E2 region. The CPB  
467 E2-H333N and CPB E1-S247L were generated by QuikChange site-directed  
468 mutagenesis.

469 Wild-type and mutant cDNA clones were linearized with Sac I and in vitro  
470 transcribed with SP6 polymerase at 39°C for 2 hr. For electroporation of BHK cells,  
471 approximately 10<sup>7</sup> BHK cells were trypsinized, washed two times with phosphate-

472 buffered saline (PBS), and resuspended with PBS to a final volume of 500  $\mu$ l. The cells  
473 were mixed with *in vitro*-transcribed RNA in a 2-mm-gap cuvette and pulsed once at 1.5  
474 kV, 25  $\mu$ F, and 200  $\Omega$  using a Bio-Rad Gene Pulser Xcell electroporation system (Bio-  
475 Rad Laboratories, Hercules, CA). Following a 5-min recovery at room temperature, the  
476 cells were diluted 1:10 in cell medium and incubated at 37°C in the presence of 5%  
477 CO<sub>2</sub>. At the indicated time points (around 24 hours post infection for WT, CPB E2-  
478 H333N, CPB E1-S247L, and 40 hours post infection for CPB), virus was harvested, and  
479 the titer was determined using a standard plaque assay procedure (23). Plaques were  
480 detected at 48 hours post-infection by formaldehyde fixation and crystal violet staining.

481

#### 482 **One-step growth analysis**

483 Confluent 12-well plates of BHK cells were infected with virus at MOI of 1 PFU/cell at  
484 room temperature for 1 hr. Following this adsorption period, the cells were washed with  
485 PBS to remove any unbound particles, and 400  $\mu$ L of media was added. At the  
486 indicated time points, 400  $\mu$ L media was removed and replaced with fresh media. The  
487 titers of these samples were determined by standard plaque assay and plotted against  
488 time. *P* values were calculated using Welch's unpaired *t* test.

489

#### 490 **Identification of second-site revertants**

491 Large plaques were detected from media of CPB infected BHK cells more than 40  
492 hours post-electroporation. As previously described (23), large plaques were isolated  
493 and used to infect BHK cells. The infected cells were lysed at 14 hours post-infection  
494 with TRIzol reagent (Invitrogen, Carlsbad, CA), and cytoplasmic RNA was isolated

495 using chloroform extraction. The coding sequence of the structural polyprotein was  
496 amplified from the viral RNA using RT-PCR and two primers, one specific for the E1  
497 region and the other specific for the E2 region. The region corresponding to the  
498 structural polyprotein was sequenced to identify the location of the potential second-site  
499 mutation. To verify that the large plaque phenotypes were due to the mutation identified  
500 in sequencing, the revertant sites were introduced back into the chimeric viruses and  
501 growth kinetics and plaque sizes were analyzed.

502

### 503 **Virus purification**

504 150 mm dishes were infected with 3 mL virus at a MOI of 0.1 PFU/cell at room  
505 temperature for 1 hr. After the adsorption period, the cells were overlaid with 15 mL  
506 serum-free media (Thermo Fisher Scientific life technologies, Waltham, MA)  
507 supplemented with nonessential amino acids, L-glutamine, and antibiotic-antimycotic  
508 solution (Corning). Medium was collected approximately 24 hours post infection for BHK  
509 cells. For C6/36 cells, 5 mL fresh serum-free media was added after 72 hours, and  
510 medium was collected after approximately 120 hours post infection. The medium was  
511 then spun down at  $1157 \times g$  for 5 min at  $15^{\circ}\text{C}$  to remove cells and cell debris. Virus  
512 particles from the clarified medium was pelleted through sucrose cushion. The clarified  
513 medium was overlaid onto 3 ml 27% sucrose in 20 mM HN buffer (20 mM HEPES, pH  
514 7.5, and 150 mM NaCl) and spun at  $140,000 \times g$  for 2.5 h at  $15^{\circ}\text{C}$  (36, 48).

515

### 516 **SDS PAGE gel of purified virus particles**

517 Purified virus particles were loaded onto an 8% SDS gel containing 0.5% 2,2,2-  
518 trichloroethylene v/v in the resolving gel, and run for approximately 45 minutes at 200 V.  
519 The gel was imaged with the Bio-Rad ChemiDoc MP Imaging System using the stain-  
520 free image setting. The PageRuler prestained protein ladder (Thermo Fisher Scientific-  
521 Invitrogen, Waltham, MA) was used in all studies.

522

### 523 **Immunofluorescence analysis of cell surface spike protein expression**

524 SINV was purified from BHK and C6/36 cells. The purified particles were ran on an  
525 SDS-PAGE gel and the glycoprotein bands were excised and sent to Cocalico  
526 Biologics, Inc (Stevens, PA) to generate polyclonal antibodies. The primary antibodies  
527 were pre-cleared to reduce background signal from non-specific cell binding. A  
528 confluent well of BHK cells was washed twice with PBS, chilled with PBS for 2 hours,  
529 and then incubated at 4°C with 200 µL of a 1:10 dilution of antibody in cold PBS for 2  
530 hours while rocking. The antibody mixture was removed and centrifuged, and the  
531 supernatant was saved and used in immunofluorescence studies.

532 BHK cells were grown on coverslips and at approximately 75% confluency were  
533 infected with virus at an MOI of 2 PFU/cell at room temperature for 90 minutes. After  
534 this adsorption period, fresh media was added, and cells were incubated at 37°C in the  
535 presence of 5% CO<sub>2</sub>. Ten hours post infection, the cells were washed with PBS and  
536 then fixed with 4% paraformaldehyde (Thermo Fisher Scientific Life Technologies,  
537 Waltham, MA) at room temperature for 10 minutes. 16% EM-grade paraformaldehyde  
538 was diluted in PBS to make 4% paraformaldehyde; the EM-grade paraformaldehyde is  
539 methanol-free to avoid permeabilization. The cells were then washed, blocked in 2.5%

540 BSA in PBS for 30 minutes, and incubated with pre-cleared polyclonal anti-E2/E1 (1:50  
541 of pre-cleared) in 2.5% BSA for 45 minutes. Cells were washed and incubated with  
542 Alexa 488 Goat anti-Rabbit secondary antibody (1:5000) in 2.5% BSA in PBS for 45  
543 minutes in the dark. Cells were then washed and stained with DAPI. The coverslips  
544 were carefully removed, dipped in distilled water and blotted, and inverted onto 5  $\mu$ L of  
545 Aqua-Poly/Mount (Polysciences, Warrington, PA) on a slide. Slides were imaged using  
546 an Olympus 1X71 fluorescence microscope (Olympus, Center Valley, PA).

547

### 548 **Transmission electron microscopy**

549 Four  $\mu$ L of purified virus was applied to a Formvar- and carbon-coated 400-mesh  
550 copper grid (Electron Microscopy Sciences, Hatfield, PA) for 25 seconds, washed with 4  
551  $\mu$ L water for 25 seconds, and stained with 2% uranyl acetate for 25 seconds. The  
552 stained grids were analyzed using a JEOL 1010 transmission electron microscope  
553 (Tokyo, Japan) operating at 80 kV. Images were recorded using a Gatan UltraScan  
554 4000 charge-coupled-device camera (Pleasanton, CA).

555

### 556 **Cryo-EM imaging and 3D reconstruction**

557 To prepare a frozen-hydrated cryo-EM specimen, approximately 4  $\mu$ L of purified  
558 virus sample was applied to a glow-discharged 300-mesh copper grid coated with  
559 continuous carbon film (Electron Microscopy Sciences, Hatfield, PA). The grid was  
560 plunged into a liquid ethane container that is further cooled by a liquid nitrogen bath.  
561 This process was performed using Vitrobot Mark IV under 4 degree and 100% humidity  
562 (Thermo Fisher Scientific-Invitrogen, Waltham, MA). Frozen-hydrated cryo-EM grids for



563 all samples except SINV WT (C6/36) were clipped into cartridges and then transferred  
564 into a cassette according to the manufacture protocol. The cassette was loading inside  
565 a 300-kV Titan Krios G3i equipped with Gatan BioContinuum™ K3 direct electron  
566 detection camera. Data acquisition was set up using TFS EPU under counted super-  
567 resolution mode. The nominal magnification is 64,000x (equal to 0.7 Å per pixel) and the  
568 illumination has a dose rate of 1 e-/Å<sup>2</sup> per frame under the exposure preset with a total  
569 dose of 30 e-/Å<sup>2</sup>. Zero-loss peak was aligned every hour with an energy slit opened at  
570 20 eV. Data collection for SINV WT (C6/36) was done by using a 300-kV JEOL JEM-  
571 3200FS TEM equipped with DE-12 CMOS camera (Direct Electron). The frozen  
572 hydrated grid was transferred to a Gatan 626 cryo-holder and inserted into the TEM.  
573 The nominal magnification was set to 80,000x (equal to 1.9 e-/Å<sup>2</sup>). The zero-loss peak  
574 was aligned at the beginning of the data collection with a slit opened at 20 eV. The total  
575 accumulated dose is ~30 e-/Å<sup>2</sup>.

576 Image analysis was performed using Relion (v3.1) (49). Initial particle picking was  
577 done by Laplacian-of-Gaussian filtered auto-picking method implemented in Relion (50).  
578 Subsequently, 2D classification was used to eliminate the noise density that got picked  
579 earlier and the 3D initial model was built de novo. This initial model was then used as a  
580 template for automatic particle picking for all samples. Similarly, multiple runs of 2D  
581 classification and 3D refinement were performed to obtain the final 3D models  
582 (summarized in Table 2). Each volume was rendered using UCSF ChimeraX (51).

583

584 **Acknowledgements**

585 We thank IU Virology group for constructive discussions and Jim Powers, Walczak  
586 and Shaw labs and the IU Light Microscopy Facility. Funding for this work from IU Wells  
587 Scholars Program and LS McClung Fellowship (SCR), the startup fund from The  
588 Pennsylvania State University College of Medicine to J.C.-Y.W and IU IAS (SM). We  
589 also gratefully acknowledge The Pennsylvania State University College of Medicine for  
590 access to the Cryo-EM (RRID:SCR\_021178) and the HPC core facilities.

591

## 592 **FIGURE LEGENDS**

593 **Figure 1: Inter-dimer interface residues in Domain C of E2 may be important for**  
594 **spike assembly.** (A) Crystal structure of CHIKV glycoproteins E2 (blue) and E1 (yellow)  
595 (PDB ID: 3N40) (29) fit into cryo-EM map of SINV (PDB ID:1Z8Y) (29). One trimeric  
596 spike is outlined. (B) During assembly, E1 (*shades of yellow*) forms heterodimers with  
597 E2 (*shades of blue*), and these dimers then trimerize. A top view of one of these trimeric  
598 spikes, with the individual E2 (in teal, light blue, and blue) and E1 (in gold, light yellow,  
599 and saffron) proteins is shown here. A total of 80 spikes are on the surface of the  
600 alphavirus particle. (C) The trimer is rotated 90 degrees for a side view. The light blue  
601 E2 and light yellow E1 are a heterodimer. Intra-dimer contacts occur between Domains I  
602 and II of E1 with Domains A, B, C of E2. The teal E2' and gold E1' form another  
603 heterodimer, with similar intra-dimer contacts. The last dimer in the spike is shown in  
604 grey. (D) A 60-degree rotation of (C) highlights an inter-dimer interface in the trimer.  
605 Inter-dimer contacts are between the gold E1' of one heterodimer and the light blue E2  
606 in the adjacent dimer. Domain C of E2 (red dashed circle) is sandwiched between the  
607 adjacent E1' (gold) and its cognate E1 (light yellow), forming inter-dimer and intra-dimer

608 contacts, respectively. (E) The same proteins, E1', E2, and E1, shown in (D) are color  
609 coded by domain here. Domain III of E1/E1' is dark green, Domain I of E1/E1' is yellow-  
610 green, and Domain II of E1/E1' is yellow. Domain C of E2 is in dark purple and Domain I  
611 and II are in light purple. The other monomers are colored gray for clarity. (F) Ribbon  
612 diagram of the inter-dimer of E1'-E2. Residues in E1' that contact E2 are in yellow  
613 residues in E2 that contact E1' are in blue spheres (light and dark). The residues  
614 mutated in this study are in dark blue spheres. (G) Amino acid alignment of CHIKV and  
615 SINV E2 in the inter-dimer region; SINV residues shown in black and CHIKV residues  
616 shown in red. The CHIK-Piggy-Back (CPB) chimera was generated by substituting the  
617 non-homologous E2 CHIKV residues for the corresponding SINV E2 residues  
618 (*highlighted in red in CPB*) in this region.

619

620 **Figure 2: CPB grows slower than WT SINV in mammalian cells compared to in**  
621 **mosquito cells.** Cells were infected at an MOI of 1 PFU/cell. At the indicated time  
622 points, media was collected and replaced with fresh media. The titers of the collected  
623 samples were determined by standard plaque assay on BHK cells. Results are shown  
624 for one representative experiment (N=5). (A) Growth kinetics of infectious virus released  
625 from BHK cells at 37°C show CPB was attenuated by 1-1.5 logs relative to WT SINV.  
626 (B) Growth kinetics of virus grown in C6/36 cells at 28°C show CPB releases infectious  
627 particles at the same rate as WT SINV. (C) Growth kinetics of virus grown in BHK cells  
628 at 28°C show that CPB growth is still attenuated by 1-1.5 logs relative to WT SINV.

629

630 **Figure 3: Two CPB revertants map close to the inter-dimer interface and grow**  
631 **similarly to WT SINV.**

632 (A) CPB collected 20-40 hours post-electroporation have smaller plaques compared to  
633 WT SINV plaques ( $p < 0.0015$ , see 3C). When CPB is harvested later, or as it is  
634 passaged in BHK cells, larger plaques are seen in addition to the small plaques. Five of  
635 these larger plaques were isolated, the RNA was sequenced, and two independent  
636 second-site revertants were found. (B) The locations of two second-site revertant sites,  
637 H333N in E2 (*cyan*) and S247L in E1 (*red*), are shown in the E1'-E2 dimer. E1' and E2  
638 contact residues are colored in yellow and blue, respectively, as they were in Figure 1F;  
639 mutated sites in CPB are in dark blue. (C) CPB E2-H333N and CPB E1-S247L were  
640 introduced independently into CPB. Plaque size of CPB E2-H333N and CPB E1-S247L  
641 in BHK cells was larger compared to CPB and not significantly (ns) different from WT.  
642 (D) Growth kinetics of the two revertants show they have comparable titers as WT SINV  
643 in BHK and (E) C6/36 cells. Representative curves are shown (N=3). Cells were  
644 infected at an MOI of 1 PFU/cell, media was collected at the indicated time points, and  
645 samples titered on BHK cells.

646

647

648 **Figure 4: Particle morphology and composition is restored in CPB revertants to**  
649 **varying degrees.** Cells were infected at a MOI of 0.1 PFU/cell for 1 hour, after which  
650 serum-free media was overlaid. Infected BHK media was collected after 24 hours, and  
651 infected C6/36 media was collected after 120 hours. The media was clarified and  
652 purified through a sucrose cushion at  $140,000 \times g$  for 2.5 h. (A and B) To determine the

653 composition of the virions, purified virus was solubilized in reducing SDS sample buffer,  
654 run on an 8% SDS-PAGE gel, and imaged by stain-free TCE. CPB particles have a  
655 reduced level of E2/E1 glycoproteins in particles purified from BHK cells. The E1  
656 deglycosylation control is SINV E1-N245/246Q, which has one of its two E1  
657 glycosylation sites deglycosylated resulting in a faster migrating E1 protein band, and  
658 the E1/E2 deglycosylation control is E1-N139Q/E2-N318Q and has a deglycosylation  
659 site in both E1 and E2 resulting in faster migration in each of those protein bands. (C  
660 and D) Purified particles were applied to a Formvar- and carbon-coated 400-mesh  
661 copper grid, stained with 2% uranyl acetate, and imaged at  $\times 20,000$  magnification with  
662 the JEOL 1010 transmission electron microscope. Scale bar for TEM = 200nm.

663

664 **Figure 5: CPB glycoprotein spikes are transported to the plasma membrane of**  
665 **BHK cells in approximately equal amounts compared to WT.** BHK cells were  
666 infected at an MOI of 2 PFU/cell. Ten hours post-infection, the cells were fixed with 4%  
667 EM-grade paraformaldehyde and probed for SINV E1/E2. Images were taken at  $\times 40$   
668 magnification on a Nikon Ni-E microscope. Representative images are shown (N=4). (A)  
669 Brightfield images and (B) DAPI staining show cells in field of view and their nuclei in  
670 blue. (C) Cell surface E2/E1 expression shown in green, Alexa Fluor 488 was the  
671 secondary antibody. (D) Anti-E2/E1+DAPI merge shows green fluorescence from  
672 surface glycoprotein expression relative to the cells present.

673

674 **Figure 6. Cryo-EM 3D reconstructions show that CPB spikes from mammals**  
675 **cells have an altered interdimer organization.** (A-F) Radially colored isosurface

676 rendering of WT SINV, CPB, and SINV E1-S247L from BHK cells (A-C, top row) and  
677 C6/36 cells (D-F, bottom row). All views are at the 5-fold axis. All six maps have a  
678 similar outer appearance with 80 spikes decorating a fenestrated surface. In (A), the  
679 white triangle shows one asymmetric unit. Filled oval, triangle, and pentagon indicate  
680 locations of twofold, threefold and fivefold axes, respectively. The dotted circle shows  
681 one of the spikes on the quasi-three axis. (G-L) Enlarged views of SINV spikes at the  
682 quasi-threefold location, all images shown at 10 Å resolution for comparison purposes.  
683 The spike of CPB from BHK (H) shows a distinct organization from other SINV spikes.  
684 Black arrowheads indicate the difference in the electron density between each  
685 interdimer interface. Red arrowheads show glycan modification at E2-196.

686

687 **REFERENCES**

- 688  
689 1. Griffin DE. 2013. Chapter 23: Alphaviruses, p 652-770. *In* Knipe DM, Howley PM  
690 (ed), *Fields' Virology*. Lippincott Williams & Wilkins, Philadelphia, PA.
- 691 2. Kuhn RJ. 2013. Chapter 22: Togaviridae, p 629-650. *In* Knipe DM, Howley PM  
692 (ed), *Fields' Virology*. Lippincott Williams & Wilkins, Philadelphia.
- 693 3. Hermanns K, Marklewitz M, Zirkel F, Overheul GJ, Page RA, Loaiza JR, Drosten  
694 C, van Rij RP, Junglen S. 2020. Agua Salud alphavirus defines a novel lineage of  
695 insect-specific alphaviruses discovered in the New World. *J Gen Virol* 101:96-  
696 104.
- 697 4. Forrester NL, Palacios G, Tesh RB, Savji N, Guzman H, Sherman M, Weaver  
698 SC, Lipkin WI. 2012. Genome-scale phylogeny of the alphavirus genus suggests  
699 a marine origin. *J Virol* 86:2729-38.
- 700 5. Firth AE, Chung BY, Fleeton MN, Atkins JF. 2008. Discovery of frameshifting in  
701 Alphavirus 6K resolves a 20-year enigma. *Virology* 375:108.
- 702 6. Chen R, Mukhopadhyay S, Merits A, Bolling B, Nasar F, Coffey LL, Powers A,  
703 Weaver SC, ICTV Report C. 2018. ICTV Virus Taxonomy Profile: Togaviridae. *J*  
704 *Gen Virol* 99:761-762.
- 705 7. Cheng RH, Kuhn RJ, Olson NH, Rossmann MG, Choi HK, Smith TJ, Baker TS.  
706 1995. Nucleocapsid and glycoprotein organization in an enveloped virus. *Cell*  
707 80:621-30.
- 708 8. Tang J, Jose J, Chipman P, Zhang W, Kuhn RJ, Baker TS. 2011. Molecular links  
709 between the E2 envelope glycoprotein and nucleocapsid core in Sindbis virus. *J*  
710 *Mol Biol* 414:442-59.
- 711 9. Jose J, Przybyla L, Edwards TJ, Perera R, Burgner JW, 2nd, Kuhn RJ. 2012.  
712 Interactions of the cytoplasmic domain of Sindbis virus E2 with nucleocapsid  
713 cores promote alphavirus budding. *J Virol* 86:2585-99.
- 714 10. Lee S, Owen KE, Choi HK, Lee H, Lu G, Wengler G, Brown DT, Rossmann MG,  
715 Kuhn RJ. 1996. Identification of a protein binding site on the surface of the  
716 alphavirus nucleocapsid and its implication in virus assembly. *Structure* 4:531-41.
- 717 11. Skoging U, Vihinen M, Nilsson L, Liljestrom P. 1996. Aromatic interactions define  
718 the binding of the alphavirus spike to its nucleocapsid. *Structure* 4:519-29.
- 719 12. Zhao H, Lindqvist B, Garoff H, von Bonsdorff CH, Liljestrom P. 1994. A tyrosine-  
720 based motif in the cytoplasmic domain of the alphavirus envelope protein is  
721 essential for budding. *EMBO J* 13:4204-11.

- 722 13. Melancon P, Garoff H. 1987. Processing of the Semliki Forest virus structural  
723 polyprotein: role of the capsid protease. *J Virol* 61:1301-9.
- 724 14. Mayne JT, Rice CM, Strauss EG, Hunkapiller MW, Strauss JH. 1984.  
725 Biochemical studies of the maturation of the small Sindbis virus glycoprotein E3.  
726 *Virology* 134:338-57.
- 727 15. Lobigs M, Zhao HX, Garoff H. 1990. Function of Semliki Forest virus E3 peptide  
728 in virus assembly: replacement of E3 with an artificial signal peptide abolishes  
729 spike heterodimerization and surface expression of E1. *J Virol* 64:4346-55.
- 730 16. Liu N, Brown DT. 1993. Transient translocation of the cytoplasmic (endo) domain  
731 of a type I membrane glycoprotein into cellular membranes. *J Cell Biol* 120:877-  
732 83.
- 733 17. Harrington HR, Zimmer MH, Chamness LM, Nash V, Penn WD, Miller TF, 3rd,  
734 Mukhopadhyay S, Schleich JP. 2020. Cotranslational folding stimulates  
735 programmed ribosomal frameshifting in the alphavirus structural polyprotein. *J*  
736 *Biol Chem* 295:6798-6808.
- 737 18. Mulvey M, Brown DT. 1996. Assembly of the Sindbis virus spike protein complex.  
738 *Virology* 219:125-32.
- 739 19. Molinari M, Helenius A. 1999. Glycoproteins form mixed disulphides with  
740 oxidoreductases during folding in living cells. *Nature* 402:90-3.
- 741 20. Molinari M, Helenius A. 2000. Chaperone selection during glycoprotein  
742 translocation into the endoplasmic reticulum. *Science* 288:331-3.
- 743 21. Mulvey M, Brown DT. 1994. Formation and rearrangement of disulfide bonds  
744 during maturation of the Sindbis virus E1 glycoprotein. *J Virol* 68:805-12.
- 745 22. Mulvey M, Brown DT. 1995. Involvement of the molecular chaperone BiP in  
746 maturation of Sindbis virus envelope glycoproteins. *J Virol* 69:1621-7.
- 747 23. Snyder AJ, Mukhopadhyay S. 2012. The alphavirus E3 glycoprotein functions in  
748 a clade-specific manner. *J Virol* 86:13609-20.
- 749 24. Uchime O, Fields W, Kielian M. 2013. The role of E3 in pH protection during  
750 alphavirus assembly and exit. *J Virol* 87:10255-62.
- 751 25. Sjoberg M, Lindqvist B, Garoff H. 2011. Activation of the alphavirus spike protein  
752 is suppressed by bound E3. *J Virol* 85:5644-50.
- 753 26. Lobigs M, Garoff H. 1990. Fusion function of the Semliki Forest virus spike is  
754 activated by proteolytic cleavage of the envelope glycoprotein precursor p62. *J*  
755 *Virol* 64:1233-40.



- 756 27. Zhang X, Fugere M, Day R, Kielian M. 2003. Furin processing and proteolytic  
757 activation of Semliki Forest virus. *J Virol* 77:2981-9.
- 758 28. Jose J, Taylor AB, Kuhn RJ. 2017. Spatial and Temporal Analysis of Alphavirus  
759 Replication and Assembly in Mammalian and Mosquito Cells. *MBio* 8.
- 760 29. Voss JE, Vaney MC, Duquerroy S, Vonrhein C, Girard-Blanc C, Crublet E,  
761 Thompson A, Bricogne G, Rey FA. 2010. Glycoprotein organization of  
762 Chikungunya virus particles revealed by X-ray crystallography. *Nature* 468:709-  
763 12.
- 764 30. Li L, Jose J, Xiang Y, Kuhn RJ, Rossmann MG. 2010. Structural changes of  
765 envelope proteins during alphavirus fusion. *Nature* 468:705-8.
- 766 31. Lescar J, Roussel A, Wien MW, Navaza J, Fuller SD, Wengler G, Rey FA. 2001.  
767 The fusion glycoprotein shell of Semliki Forest virus: an icosahedral assembly  
768 primed for fusogenic activation at endosomal pH. *Cell* 105:137-48.
- 769 32. Tsetsarkin KA, Chen R, Leal G, Forrester N, Higgs S, Huang J, Weaver SC.  
770 2011. Chikungunya virus emergence is constrained in Asia by lineage-specific  
771 adaptive landscapes. *Proc Natl Acad Sci U S A* 108:7872-7.
- 772 33. Tsetsarkin KA, Chen R, Yun R, Rossi SL, Plante KS, Guerbois M, Forrester N,  
773 Perng GC, Sreekumar E, Leal G, Huang J, Mukhopadhyay S, Weaver SC. 2014.  
774 Multi-peaked adaptive landscape for chikungunya virus evolution predicts  
775 continued fitness optimization in *Aedes albopictus* mosquitoes. *Nat Commun*  
776 5:4084.
- 777 34. Weaver SC, Winegar R, Manger ID, Forrester NL. 2012. Alphaviruses:  
778 population genetics and determinants of emergence. *Antiviral Res* 94:242-57.
- 779 35. Pletnev SV, Zhang W, Mukhopadhyay S, Fisher BR, Hernandez R, Brown DT,  
780 Baker TS, Rossmann MG, Kuhn RJ. 2001. Locations of carbohydrate sites on  
781 alphavirus glycoproteins show that E1 forms an icosahedral scaffold. *Cell*  
782 105:127-136.
- 783 36. Dunbar CA, Rayaprolu V, Wang JC, Brown CJ, Leishman E, Jones-Burrage S,  
784 Trinidad JC, Bradshaw HB, Clemmer DE, Mukhopadhyay S, Jarrold MF. 2019.  
785 Dissecting the Components of Sindbis Virus from Arthropod and Vertebrate  
786 Hosts: Implications for Infectivity Differences. *ACS Infect Dis* 5:892-902.
- 787 37. Zandi R, Reguera D, Bruinsma RF, Gelbart WM, Rudnick J. 2004. Origin of  
788 icosahedral symmetry in viruses. *Proc Natl Acad Sci U S A* 101:15556-60.
- 789 38. Basore K, Kim AS, Nelson CA, Zhang R, Smith BK, Uranga C, Vang L, Cheng M,  
790 Gross ML, Smith J, Diamond MS, Fremont DH. 2019. Cryo-EM Structure of  
791 Chikungunya Virus in Complex with the Mxra8 Receptor. *Cell* 177:1725-1737  
792 e16.

- 793 39. Hasan SS, Sun C, Kim AS, Watanabe Y, Chen CL, Klose T, Buda G, Crispin M,  
794 Diamond MS, Klimstra WB, Rossmann MG. 2018. Cryo-EM Structures of  
795 Eastern Equine Encephalitis Virus Reveal Mechanisms of Virus Disassembly and  
796 Antibody Neutralization. *Cell Rep* 25:3136-3147 e5.
- 797 40. Kostyuchenko VA, Jakana J, Liu X, Haddow AD, Aung M, Weaver SC, Chiu W,  
798 Lok SM. 2011. The structure of barmah forest virus as revealed by cryo-electron  
799 microscopy at a 6-angstrom resolution has detailed transmembrane protein  
800 architecture and interactions. *J Virol* 85:9327-33.
- 801 41. Ribeiro-Filho HV, Coimbra LD, Cassago A, Rocha RPF, Guerra J, de Felicio R,  
802 Carnieli CM, Leme L, Padilha AC, Paes Leme AF, Trivella DBB, Portugal RV,  
803 Lopes-de-Oliveira PS, Marques RE. 2021. Cryo-EM structure of the mature and  
804 infective Mayaro virus at 4.4 Å resolution reveals features of arthritogenic  
805 alphaviruses. *Nat Commun* 12:3038.
- 806 42. Chen L, Wang M, Zhu D, Sun Z, Ma J, Wang J, Kong L, Wang S, Liu Z, Wei L,  
807 He Y, Wang J, Zhang X. 2018. Implication for alphavirus host-cell entry and  
808 assembly indicated by a 3.5Å resolution cryo-EM structure. *Nat Commun* 9:5326.
- 809 43. White J, Kielian M, Helenius A. 1983. Membrane fusion proteins of enveloped  
810 animal viruses. *Q Rev Biophys* 16:151-95.
- 811 44. White J, Helenius A. 1980. pH-dependent fusion between the Semliki Forest  
812 virus membrane and liposomes. *Proc Natl Acad Sci U S A* 77:3273-7.
- 813 45. Paroutis P, Touret N, Grinstein S. 2004. The pH of the secretory pathway:  
814 measurement, determinants, and regulation. *Physiology (Bethesda)* 19:207-15.
- 815 46. Ashbrook AW, Burrack KS, Silva LA, Montgomery SA, Heise MT, Morrison TE,  
816 Dermody TS. 2014. Residue 82 of the Chikungunya virus E2 attachment protein  
817 modulates viral dissemination and arthritis in mice. *J Virol* 88:12180-92.
- 818 47. Jupille HJ, Medina-Rivera M, Hawman DW, Oko L, Morrison TE. 2013. A  
819 tyrosine-to-histidine switch at position 18 of the Ross River virus E2 glycoprotein  
820 is a determinant of virus fitness in disparate hosts. *J Virol* 87:5970-84.
- 821 48. Wang JC, Mukhopadhyay S, Zlotnick A. 2018. Geometric Defects and  
822 Icosahedral Viruses. *Viruses* 10.
- 823 49. Scheres SH. 2016. Processing of Structurally Heterogeneous Cryo-EM Data in  
824 RELION. *Methods Enzymol* 579:125-57.
- 825 50. Zivanov J, Nakane T, Forsberg BO, Kimanius D, Hagen WJ, Lindahl E, Scheres  
826 SH. 2018. New tools for automated high-resolution cryo-EM structure  
827 determination in RELION-3. *Elife* 7.

828 51. Pettersen EF, Goddard TD, Huang CC, Meng EC, Couch GS, Croll TI, Morris JH,  
829 Ferrin TE. 2021. UCSF ChimeraX: Structure visualization for researchers,  
830 educators, and developers. *Protein Sci* 30:70-82.

831

Fig 1

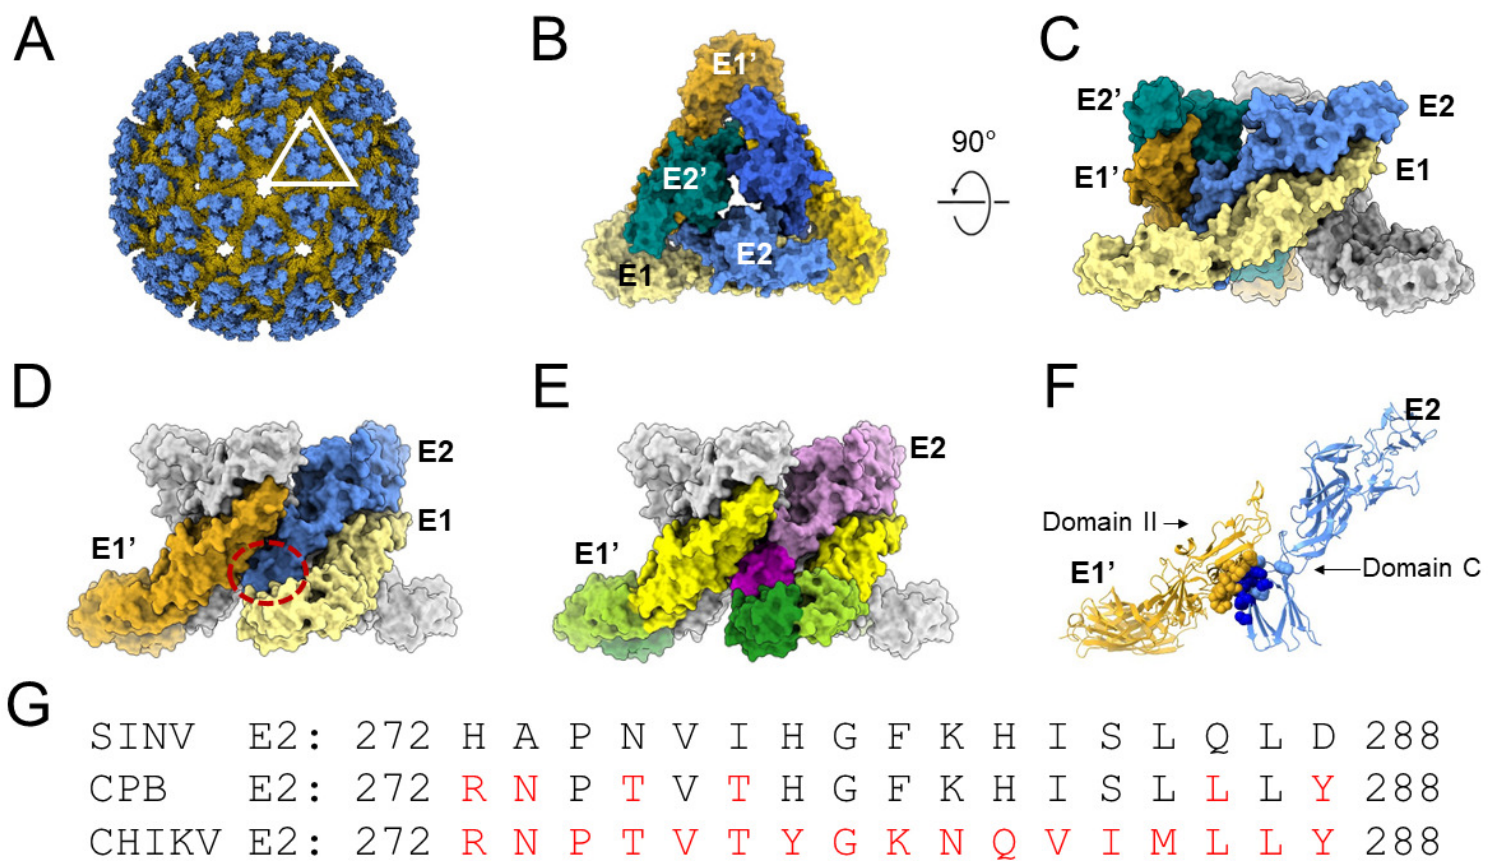

Fig 2

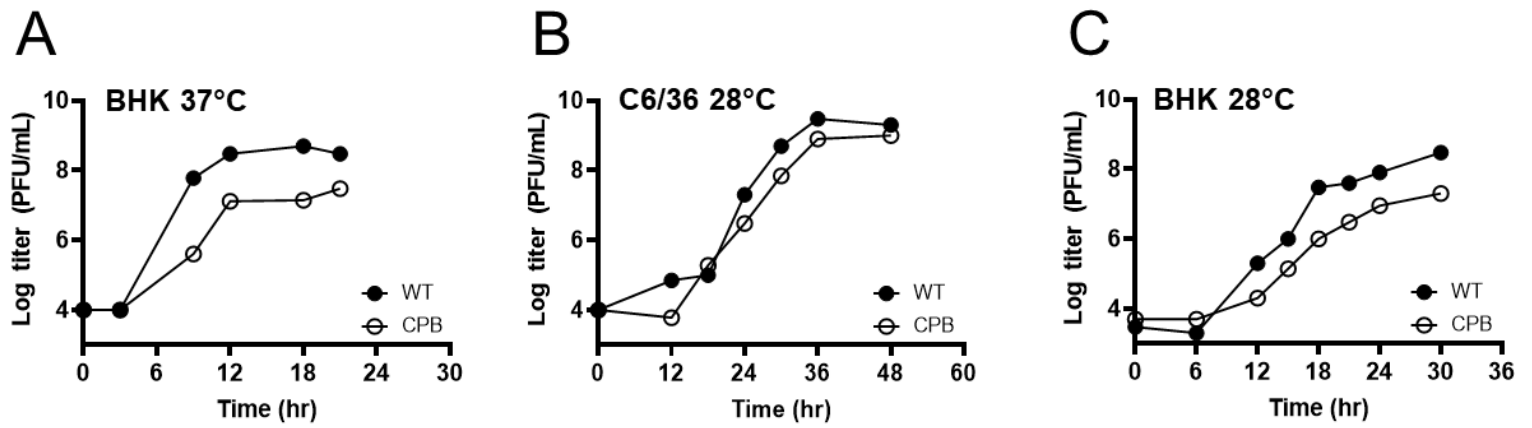

Fig 3

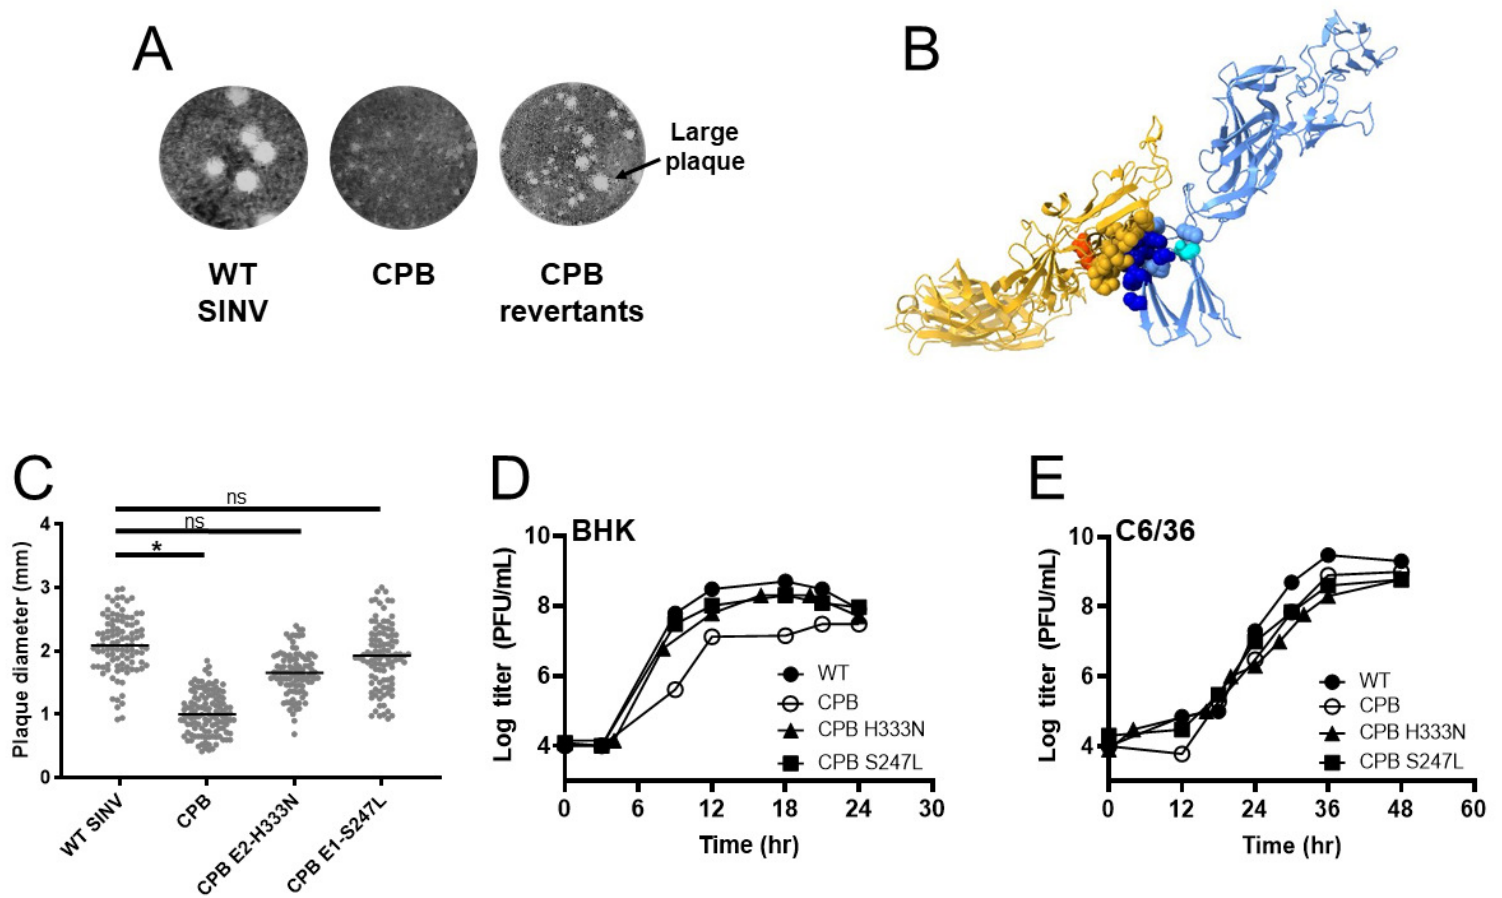

Fig 4  
A, B

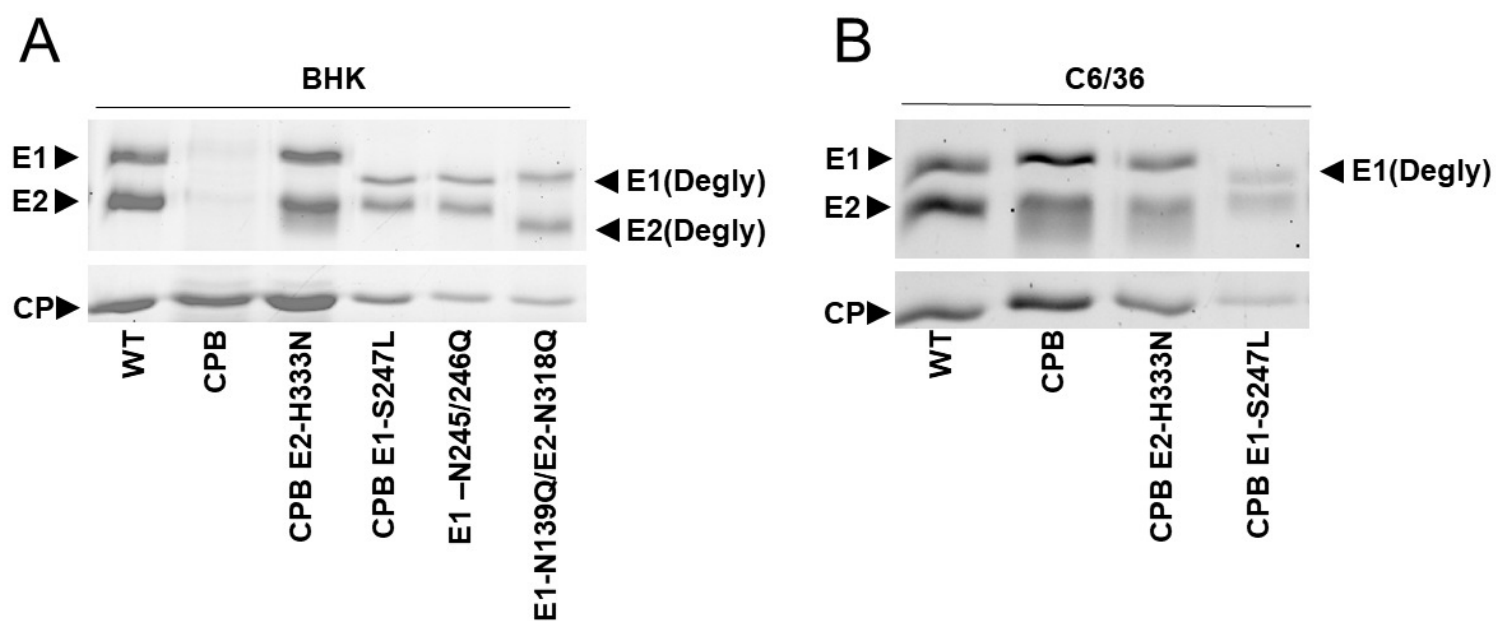



Fig 4  
C, D

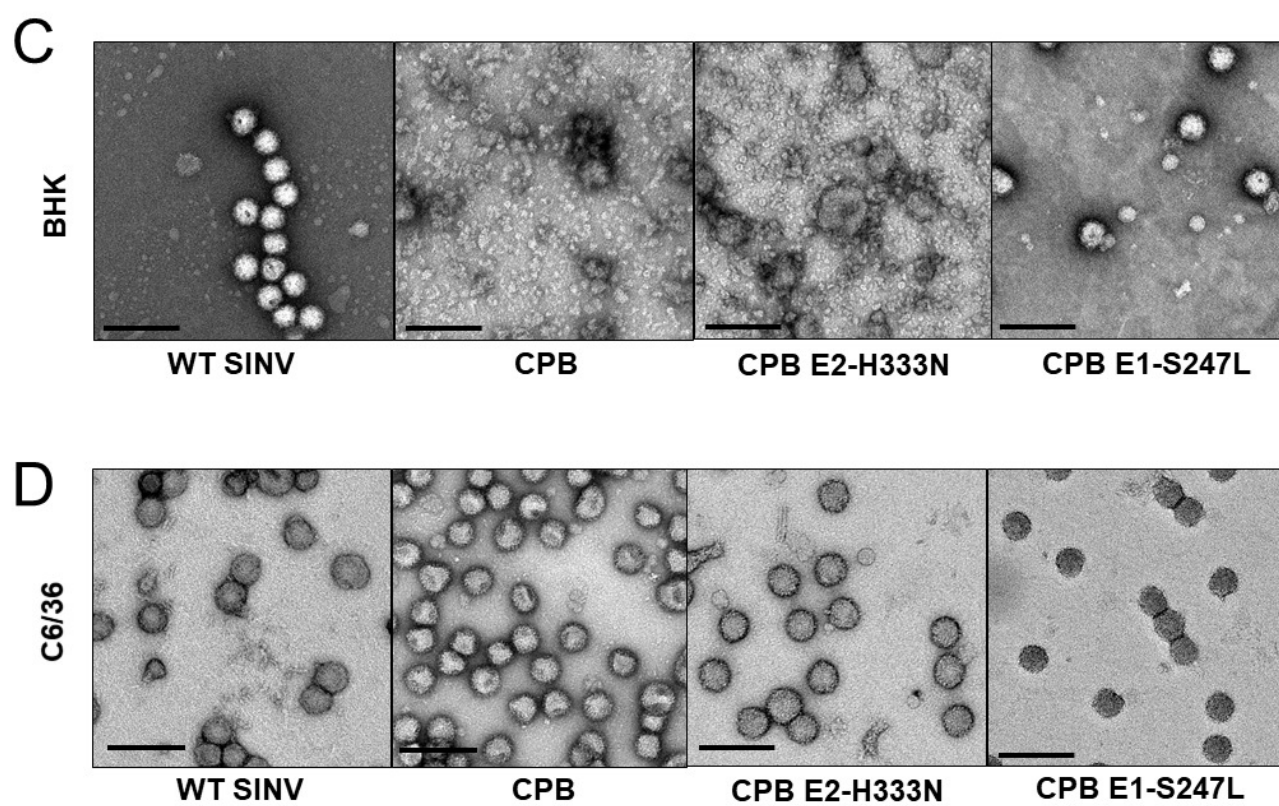



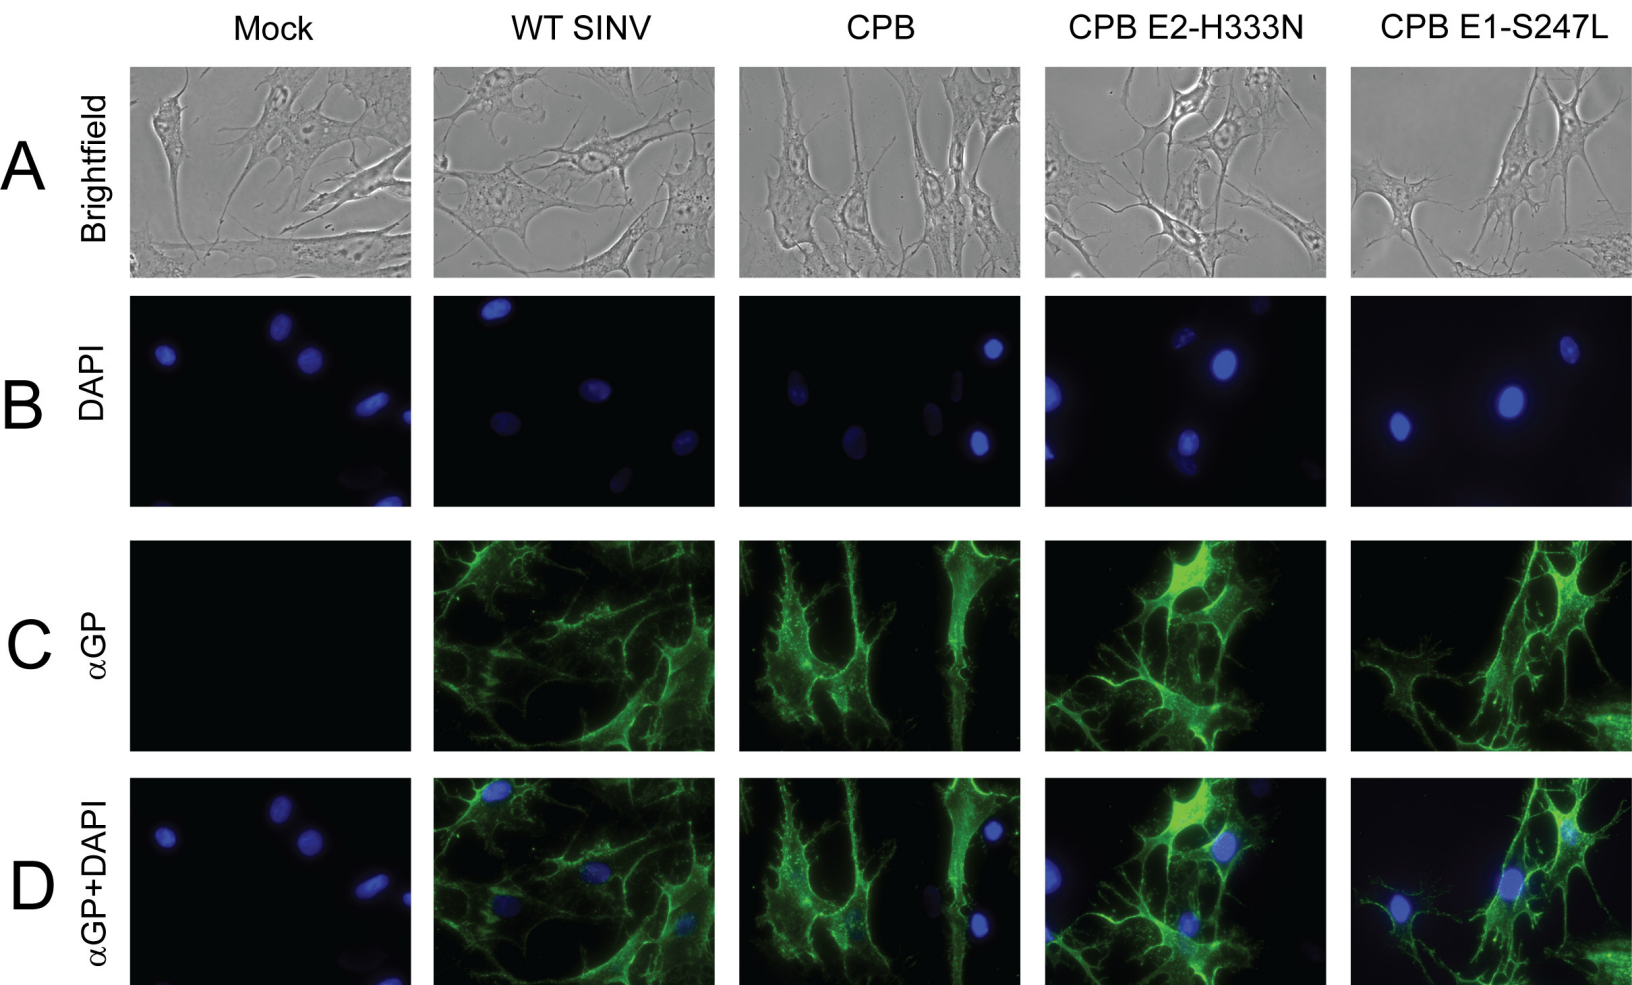

Fig 6,  
A-F

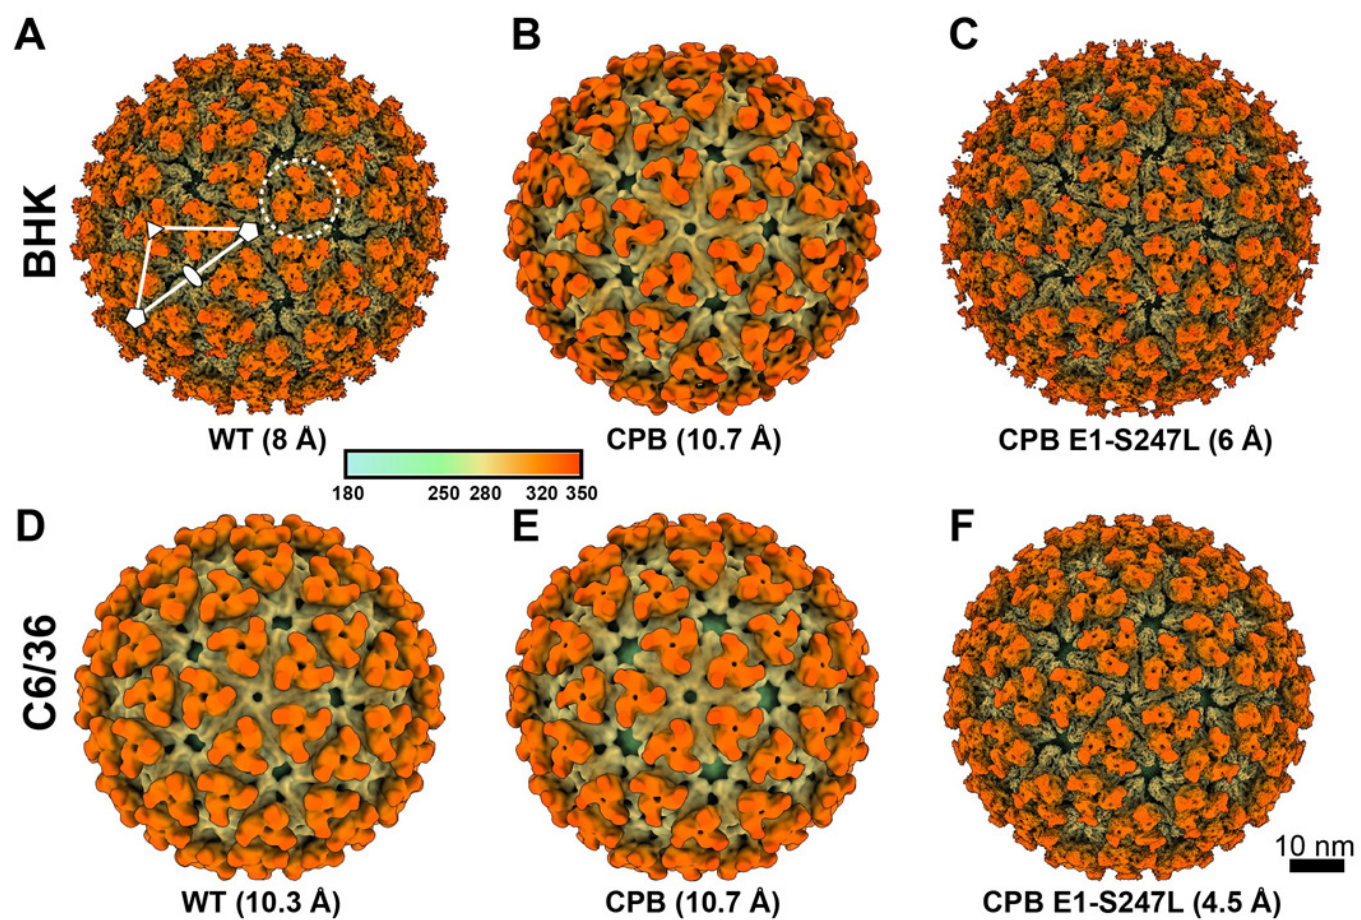

Fig 6,  
G-L

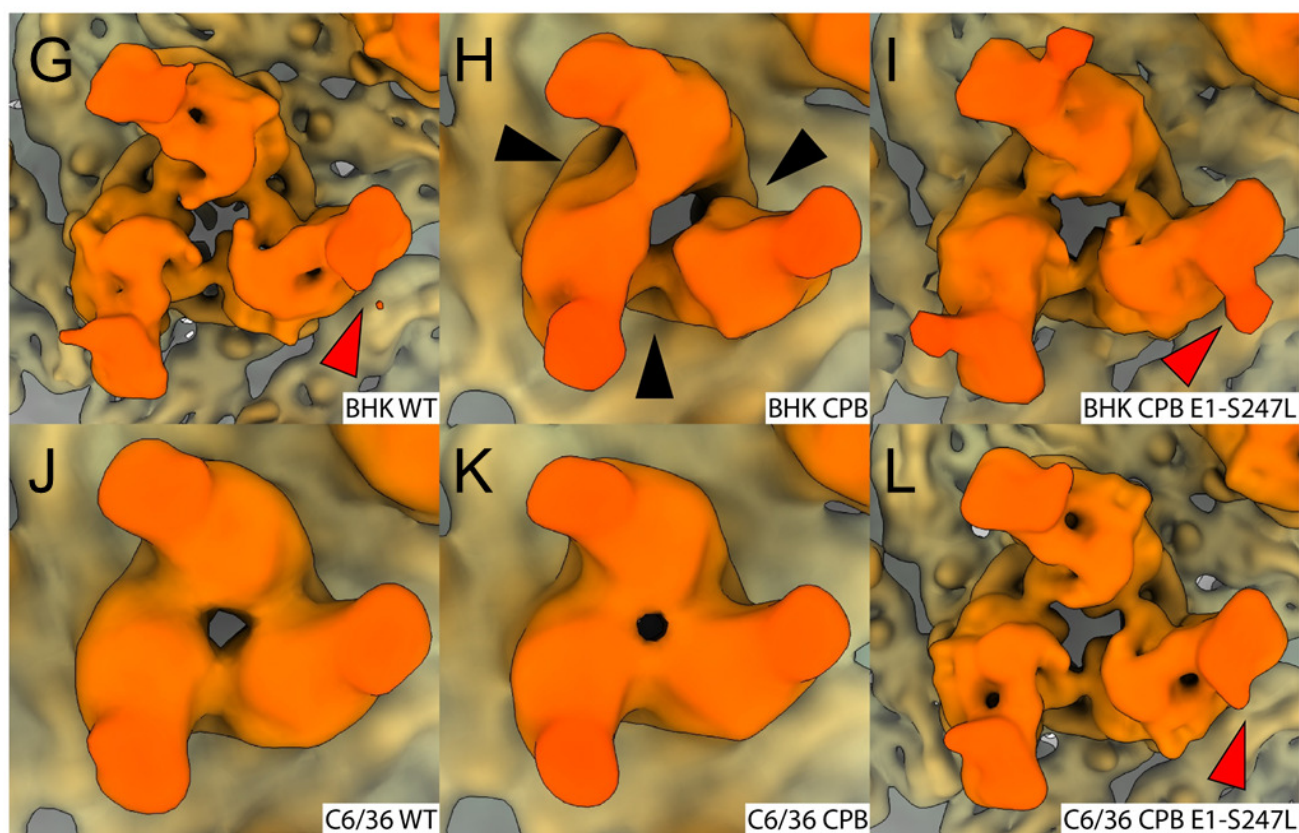

**Table 1: Location of glycosylation sites**

| <b>Virus</b> | <b>Protein</b> | <b>Glycosylation site</b> |
|--------------|----------------|---------------------------|
| SINV         | E2             | N196                      |
| SINV         | E2             | N318                      |
| SINV         | E1             | N139                      |
| SINV         | E1             | N245                      |
|              |                |                           |
| CHIKV        | E2             | N263                      |
| CHIKV        | E2             | N345                      |
| CHIKV        | E1             | N141                      |



| Reconstruction data                                      | WT SINV<br>(BHK) | CPB<br>(BHK)              | CPB E1-<br>S247L<br>(BHK) | WT SINV<br>(C6/36) | CPB<br>(C6/36)  | CPB E1-<br>S247L<br>(C6/36) |
|----------------------------------------------------------|------------------|---------------------------|---------------------------|--------------------|-----------------|-----------------------------|
| <b>Data collection information</b>                       |                  |                           |                           |                    |                 |                             |
| Electron microscope                                      | TFS Titan Krios  | TFS Titan Krios           | TFS Titan Krios           | JEOL 3200FS        | TFS Titan Krios | TFS Titan Krios             |
| Operation voltage (kV)                                   | 300              | 300                       | 300                       | 300                | 300             | 300                         |
| Electron detector                                        | Gatan K3         | Gatan K3                  | Gatan K3                  | DE-12              | Gatan K3        | Gatan K3                    |
| Energy filter (slit width in eV)                         | 20               | 20                        | 20                        | 20                 | 20              | 20                          |
| Data collection mode                                     | Counting         | Super-resolution counting | Counting                  | Integrated         | Counting        | Counting                    |
| Nominal magnification                                    | 105,000x         | 64,000x                   | 64,000x                   | 80,000x            | 64,000x         | 64,000x                     |
| Pixel size in 3D map (Å)<br>(Pixel size in the censor)   | 1.68 (0.84)      | 2.72 (0.68)               | 1.36 (1.36)               | 1.9 (1.9)          | 2.72 (1.36)     | 1.36 (1.36)                 |
| Total accumulated dose (e <sup>-</sup> /Å <sup>2</sup> ) | 30               | 30                        | 30                        | 30                 | 30              | 30                          |
| <b>Data process statistics</b>                           |                  |                           |                           |                    |                 |                             |
| Box size (pixel)                                         | 500              | 300                       | 600                       | 440                | 300             | 600                         |
| Number of particles                                      | 9037             | 15956                     | 16133                     | 7102               | 63509           | 65053                       |
| CTF estimation                                           | CTFFIND4         | CTFFIND4                  | CTFFIND4                  | CTFFIND4           | CTFFIND4        | CTFFIND4                    |
| Data processing software                                 | RELION 3.1       | RELION 3.1                | RELION 3.1                | RELION 3.1         | RELION 3.1      | RELION 3.1                  |
| Symmetry imposition                                      | I2               | I2                        | I2                        | I2                 | I2              | I2                          |
| B-factor applied (Å <sup>2</sup> )                       | -545.7           | N/A                       | -311.4                    | -297.3             | N/A             | -237.3                      |
| Final resolution (Å)                                     | 8                | 10.7                      | 5.9                       | 10.3               | 10.7            | 4.5                         |
